# Supplementary figures and images for: A Produce Prescription Program in Eastern North Carolina Results in Increased Voucher Redemption Rates and Increased Fruit and Vegetable Intake among Participants
Source: MDPI journal article supplement (doi:10.3390/nu14122431), 2022-06-11

Produce Prescription Program Flowchart

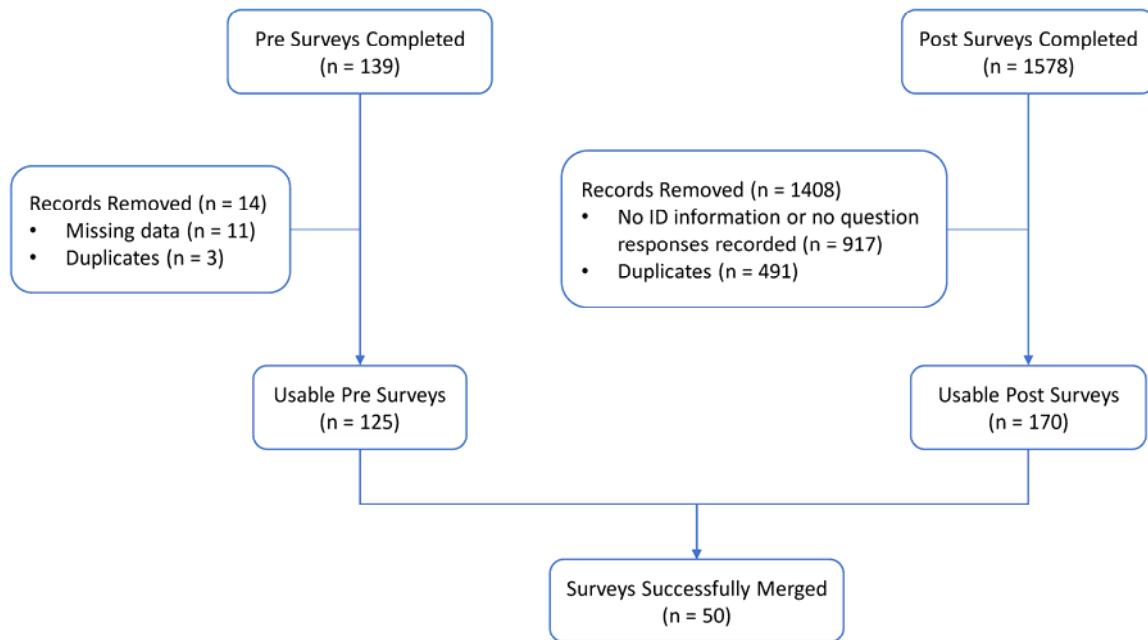

**Figure S1.** Produce Prescription Program Flowchart.

Supplement: s1 [file s1]
